# Supplementary material
Source: PubMed Central journal article supplement (PMC7225048)
Supplement: NIHMS1565620-supplement-1.pdf [file NIHMS1565620-supplement-1.pdf]

## HOXD3, a novel link between BMP9 and TGF $\beta$ 1 signaling

Lumin Wang, Ph.D.<sup>1,2</sup>, Jiayi Yao, M.D., Ph.D.<sup>2</sup>, Tongong Yu, M.D.<sup>2,3</sup>, Daoqin Zhang, Ph.D.<sup>2</sup>,  
Xiaojing Qiao, Ph.D.<sup>2</sup>, Xiuju Wu M.D., Ph.D.<sup>2</sup>, Li Zhang, Ph.D.<sup>2</sup>, Kristina I. Boström, M.D., Ph.D.<sup>2</sup>,  
<sup>4,5</sup> and Yucheng Yao, M.D., Ph.D.<sup>2,5</sup>

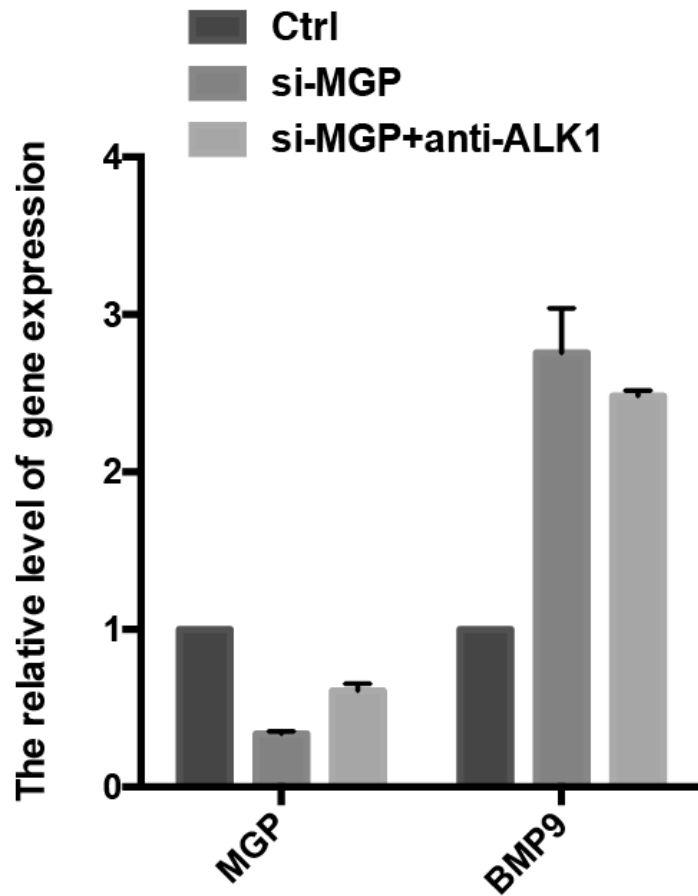

Supplemental Figure 1

BMP9 expression in HUVECs transfected with MGP siRNA and treated with anti-ALK1 antibodies, as shown by real-time PCR.

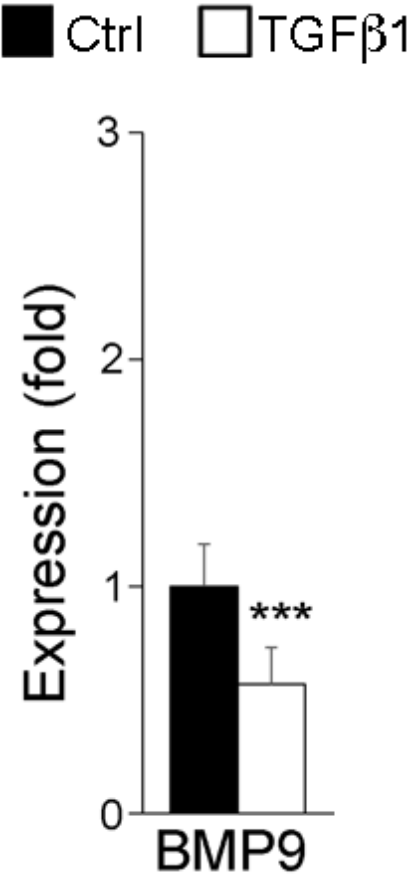

Supplemental Figure 2

Expression of BMP9 in HUVECs after treatment with TGFβ1, shown by real-time PCR,
